# Supplementary material for: A Single Argonaute Gene Participates in Exogenous and Endogenous RNAi and Controls Cellular Functions in the Basal Fungus Mucor circinelloides
Source: PLoS One. 2013 Jul 23;8(7):e69283. doi: 10.1371/journal.pone.0069283 (PMC3720535; doi:10.1371/journal.pone.0069283)
Supplement: Table S5 — Normalized reads and log2 fold change of Ago-1-bound siRNAs in the wild type compared with the ago-1 − mutant. The data are sorted for the fold change value. Only loci with a normalized abundance count higher than 50 in the wild type strain and a log2 fold change ≥1.6 (threefold or larger change) were considered in the analysis. (XLS) [file pone.0069283.s013.xls]

## Sheet: Hoja1
Locus coordinates	WT Ago-1-bound abundance	ago-1- Ago-1-bound abundance	WT log2 fold change vs ago-1-
scaffold_1:1261590-1262489(-)	101.11	0.12	9.71868
scaffold_5:1078038-1078109(+)	189.23	0.23	9.68429
scaffold_10:840451-840774(-)	166.73	0.23	9.50166
scaffold_3:3980953-3981152(-)	1007.42	1.39	9.50136
scaffold_1:4948339-4948704(+)	78.76	0.12	9.35828
scaffold_10:1160379-1161128(+)	150.05	0.23	9.34959
scaffold_3:3981817-3982026(-)	750.04	1.16	9.3367
scaffold_5:1077941-1077989(+)	295.84	0.46	9.32897
scaffold_7:855-1733(-)	55.87	0.12	8.8629
scaffold_3:3981539-3981638(-)	312.09	0.69	8.82115
scaffold_6:1408981-1409119(+)	207.99	0.46	8.82066
scaffold_5:2991644-2992917(+)	103.32	0.23	8.81127
scaffold_5:1077274-1077490(+)	308.61	0.69	8.80497
scaffold_1:535521-536077(+)	300.5	0.69	8.76655
scaffold_1:5749020-5749146(-)	99.79	0.23	8.76112
scaffold_3:3980645-3980889(-)	6679.33	16.42	8.66811
scaffold_1:4751022-4751379(+)	4724.04	12.26	8.58992
scaffold_1:4750110-4750958(+)	25885.5	67.99	8.5726
scaffold_1:5124037-5124438(-)	2321.05	6.24	8.53902
scaffold_7:396920-397428(-)	928.72	2.54	8.51427
scaffold_14:36463-36761(-)	566.91	1.62	8.45098
scaffold_3:3981208-3981332(-)	311.99	0.93	8.39005
scaffold_10:567971-568172(-)	74.2	0.23	8.33364
scaffold_1:535097-535456(+)	143.18	0.46	8.28198
scaffold_5:1078207-1078423(+)	999.73	3.24	8.2694
scaffold_4:222499-223296(+)	1180.3	4.16	8.14835
scaffold_4:2075426-2075702(-)	123.73	0.46	8.07135
scaffold_5:1076673-1077206(+)	268.89	1	8.07087
scaffold_7:869285-869646(-)	122.67	0.46	8.05893
scaffold_11:490829-490951(+)	61.24	0.23	8.0567
scaffold_5:769360-769746(+)	58.82	0.23	7.99853
scaffold_1:1902838-1904074(+)	307.35	1.27	7.91891
scaffold_8:521862-522222(-)	54.22	0.23	7.88105
scaffold_2:2390244-2390533(-)	53.98	0.23	7.87465
scaffold_1:596457-596585(+)	160.25	0.69	7.85951
scaffold_14:185393-185465(-)	105.84	0.46	7.84604
scaffold_3:886620-886758(-)	51.76	0.23	7.81406
scaffold_12:746041-746502(-)	51.47	0.23	7.80595
scaffold_11:587319-587564(-)	50.02	0.23	7.76473
scaffold_6:1696153-1696264(+)	98	0.46	7.735
scaffold_3:1847143-1847481(-)	97.81	0.46	7.7322
scaffold_6:2607285-2607556(+)	195.08	0.93	7.71262
scaffold_4:983106-985686(+)	1120.75	5.36	7.70802
scaffold_2:1654454-1654694(+)	95.58	0.46	7.69893
scaffold_2:2517397-2517616(+)	335.6	1.62	7.69461
scaffold_5:531317-531406(-)	2954.1	14.34	7.68653
scaffold_7:168910-169627(-)	92.97	0.46	7.65899
scaffold_11:808208-808684(+)	137.81	0.69	7.64187
scaffold_1:3395233-3395554(+)	273	1.39	7.61767
scaffold_12:857249-857737(-)	361.72	1.85	7.6112
scaffold_1:683894-685347(-)	113.05	0.58	7.60669
scaffold_9:713690-714001(+)	358.23	1.85	7.59722
scaffold_1:682884-683541(-)	111.45	0.58	7.58613
scaffold_9:378459-378911(-)	220.18	1.16	7.56841
scaffold_3:1574919-1575739(-)	547.94	2.89	7.5668
scaffold_2:3868184-3868580(+)	86.39	0.46	7.55309
scaffold_1:576695-577080(-)	691.61	3.7	7.54629
scaffold_6:117553-120449(-)	998.05	5.47	7.51143
scaffold_3:3981692-3981756(-)	83.49	0.46	7.50383
scaffold_1:1639879-1640298(+)	124.36	0.69	7.49371
scaffold_4:2940973-2941407(-)	249.79	1.39	7.48949
scaffold_9:356928-358271(+)	3013.92	16.96	7.47336
scaffold_3:1582270-1582352(+)	81.36	0.46	7.46654
scaffold_6:1910377-1910660(-)	164.27	0.93	7.46462
scaffold_3:124858-125136(-)	245.14	1.39	7.46238
scaffold_3:4611508-4612003(-)	101.97	0.58	7.45788
scaffold_7:396472-396847(-)	351.95	2.08	7.40264
scaffold_2:2389587-2390063(-)	116.48	0.69	7.39927
scaffold_3:2368958-2370289(-)	165.62	1	7.37173
scaffold_13:169616-169887(+)	76.14	0.46	7.37088
scaffold_10:906865-907407(-)	76.09	0.46	7.36993
scaffold_9:103157-103529(+)	487.77	3.01	7.34029
scaffold_2:2063997-2064857(+)	449.99	2.78	7.33866
scaffold_8:527049-528043(+)	333.86	2.08	7.32652
scaffold_2:4804199-4804775(+)	459.72	2.89	7.31354
scaffold_8:1244913-1245597(-)	184.34	1.16	7.3121
scaffold_3:2367678-2368283(-)	73.07	0.46	7.3115
scaffold_4:221727-222345(+)	568.13	3.58	7.31012
scaffold_4:2473055-2473493(+)	108.83	0.69	7.30126
scaffold_7:868046-868696(-)	219.12	1.39	7.30049
scaffold_1:2375453-2376973(+)	127.5	0.81	7.29836
scaffold_6:1376156-1376553(-)	72.36	0.46	7.29741
scaffold_10:171393-172046(+)	179.84	1.16	7.27645
scaffold_11:829803-830513(+)	118.25	0.77	7.26277
scaffold_9:1606492-1607666(+)	123.26	0.81	7.24957
scaffold_12:198534-198891(+)	69.9	0.46	7.24751
scaffold_5:977234-977714(+)	277.16	1.85	7.22705
scaffold_1:3653999-3654359(+)	411.1	2.78	7.20826
scaffold_7:171315-171894(-)	186.21	1.27	7.19596
scaffold_10:971898-972629(-)	287.52	1.97	7.18932
scaffold_1:4737163-4737339(-)	99.93	0.69	7.17818
scaffold_10:382317-383973(+)	451.64	3.12	7.17748
scaffold_3:887762-888202(-)	167.8	1.16	7.17647
scaffold_6:2170419-2171438(+)	365.44	2.54	7.16866
scaffold_4:726583-726848(-)	166.73	1.16	7.16725
scaffold_9:1465434-1466006(-)	198.8	1.39	7.16009
scaffold_4:4033170-4034732(+)	82.93	0.58	7.1597
scaffold_1:1901090-1902652(+)	82.8	0.58	7.15743
scaffold_4:713508-714012(+)	82.62	0.58	7.15429
scaffold_3:604641-606203(-)	82.61	0.58	7.15412
scaffold_8:1514620-1514866(-)	64.87	0.46	7.13977
scaffold_9:1466049-1466356(-)	126.34	0.93	7.08587
scaffold_1:5748514-5748766(-)	219.41	1.62	7.08149
scaffold_4:2430874-2431477(+)	779.21	5.78	7.0748
scaffold_1:4299268-4300776(+)	155.92	1.16	7.07054
scaffold_11:493579-494209(+)	60.75	0.46	7.04511
scaffold_1:1082263-1082508(+)	90.99	0.69	7.04297
scaffold_2:2518298-2518699(+)	227.42	1.73	7.03844
scaffold_5:1113262-1113805(+)	90.6	0.69	7.03677
scaffold_4:46056-46615(+)	257.62	1.97	7.03091
scaffold_4:714079-715358(+)	406.94	3.12	7.02713
scaffold_2:4622978-4623681(-)	421.31	3.24	7.02274
scaffold_4:1082249-1082579(-)	59.79	0.46	7.02213
scaffold_1:596743-597906(+)	3007.73	23.2	7.01841
scaffold_11:586459-587172(-)	223.91	1.73	7.016
scaffold_2:3368696-3369199(+)	208.67	1.62	7.00909
scaffold_3:3941845-3941979(-)	88.08	0.69	6.99607
scaffold_6:2033515-2034074(+)	147.92	1.16	6.99455
scaffold_3:4226858-4227295(-)	118.41	0.93	6.99234
scaffold_7:1557038-1557444(-)	206.01	1.62	6.99058
scaffold_10:603983-604549(-)	147.49	1.16	6.99035
scaffold_5:2511750-2512073(-)	216.09	1.7	6.98995
scaffold_9:102724-103103(+)	402.54	3.24	6.95699
scaffold_11:594283-595659(+)	731.09	5.9	6.95319
scaffold_10:971112-971304(+)	84.94	0.69	6.9437
scaffold_8:1106093-1106927(+)	753.17	6.13	6.94094
scaffold_7:170791-171256(-)	169.3	1.39	6.92835
scaffold_5:1386278-1386946(-)	279.68	2.31	6.91974
scaffold_10:1064637-1065273(-)	168.04	1.39	6.91758
scaffold_1:3726747-3728591(-)	557.94	4.63	6.91295
scaffold_4:3843333-3844379(-)	250.04	2.08	6.90943
scaffold_9:1194439-1195285(-)	372.26	3.12	6.89862
scaffold_10:908929-909252(+)	81.91	0.69	6.8913
scaffold_6:179377-179856(-)	164.07	1.39	6.88308
scaffold_1:4949308-4950310(+)	203.98	1.73	6.88151
scaffold_3:4533270-4533629(-)	163.88	1.39	6.88141
scaffold_3:1704439-1705752(-)	325	2.78	6.86921
scaffold_6:1031039-1031890(+)	348.22	3.01	6.85409
scaffold_9:724950-726074(+)	494.88	4.28	6.85332
scaffold_1:534708-534960(+)	88.68	0.77	6.84761
scaffold_8:1023557-1024216(+)	398.09	3.47	6.84202
scaffold_1:1082753-1083250(+)	580.4	5.09	6.83324
scaffold_8:1174914-1176398(-)	129.99	1.16	6.80813
scaffold_11:808707-809099(-)	103.9	0.93	6.80375
scaffold_1:140849-141595(+)	129.05	1.16	6.79766
scaffold_2:3347991-3348526(-)	50.98	0.46	6.79215
scaffold_20:9419-9861(-)	76.41	0.69	6.79102
scaffold_3:1783458-1784549(-)	229.86	2.08	6.78803
scaffold_12:856717-856988(-)	152.5	1.39	6.77758
scaffold_3:2832513-2833293(-)	975.45	8.9	6.77612
scaffold_1:5748217-5748461(-)	152.03	1.39	6.77313
scaffold_5:531471-531632(-)	2369.2	21.74	6.7679
scaffold_2:2517864-2517961(+)	150.92	1.39	6.76256
scaffold_6:1695393-1695862(+)	1266.01	11.79	6.74658
scaffold_1:89768-90466(-)	222.84	2.08	6.74328
scaffold_1:3768890-3769513(+)	514.47	4.86	6.72599
scaffold_3:2703221-2706571(-)	548.72	5.2	6.72141
scaffold_7:869711-870189(-)	145.02	1.39	6.70502
scaffold_2:2139284-2140603(-)	980.49	9.4	6.7047
scaffold_8:1055786-1056319(+)	71.78	0.69	6.70084
scaffold_9:1450248-1450552(+)	107.92	1.04	6.69723
scaffold_8:891752-892285(+)	382.94	3.7	6.69345
scaffold_4:3842486-3843068(-)	95.77	0.93	6.6862
scaffold_2:3986963-3987698(+)	283.36	2.78	6.67141
scaffold_7:208400-208838(-)	187.49	1.85	6.66314
scaffold_7:195623-196059(+)	116.96	1.16	6.65575
scaffold_8:1368639-1368992(-)	138.15	1.39	6.63501
scaffold_1:2272747-2273033(-)	68.49	0.69	6.63315
scaffold_6:1125070-1125658(-)	72.41	0.73	6.63215
scaffold_6:1241223-1241662(+)	316.7	3.24	6.61098
scaffold_1:141688-141881(+)	66.56	0.69	6.59192
scaffold_7:1792947-1793777(+)	382.92	3.99	6.58451
scaffold_9:1162881-1163279(+)	220.04	2.31	6.57373
scaffold_10:1244037-1244474(-)	87.7	0.93	6.5592
scaffold_7:1737557-1738078(-)	303.67	3.24	6.55037
scaffold_19:3514-4305(-)	259.94	2.78	6.54695
scaffold_5:2791759-2792121(+)	172.83	1.85	6.54568
scaffold_13:523594-524166(-)	234.65	2.54	6.52954
scaffold_1:4879186-4879774(+)	74.72	0.81	6.52743
scaffold_4:3209239-3209827(-)	74.72	0.81	6.52743
scaffold_5:2700838-2701426(-)	74.72	0.81	6.52743
scaffold_10:206845-207520(+)	254.32	2.78	6.51542
scaffold_5:1385520-1386187(-)	358.14	3.93	6.50985
scaffold_5:1269793-1270195(-)	62.5	0.69	6.50112
scaffold_1:3062334-3062715(+)	249.54	2.78	6.48804
scaffold_10:480769-482154(-)	477.03	5.32	6.48651
scaffold_4:1075046-1075856(+)	124.02	1.39	6.47934
scaffold_10:478662-479450(-)	701.13	7.86	6.47901
scaffold_7:202031-203362(+)	621.02	6.98	6.47527
scaffold_1:5438029-5438439(+)	753.38	8.56	6.45962
scaffold_1:5401597-5402614(+)	251.95	2.89	6.44592
scaffold_2:1367350-1369052(+)	586.37	6.76	6.43864
scaffold_12:412121-412755(-)	419.36	4.86	6.43109
scaffold_8:1104133-1104555(+)	158.8	1.85	6.42354
scaffold_5:579078-579439(-)	275.67	3.24	6.4108
scaffold_1:2273087-2273423(-)	123.09	1.46	6.3976
scaffold_1:693964-694616(-)	103.51	1.23	6.39497
scaffold_2:1505433-1506736(-)	586.6	6.98	6.39301
scaffold_6:1696446-1696810(+)	249.64	3.01	6.37394
scaffold_10:698033-698745(+)	406.78	4.93	6.36652
scaffold_4:4081808-4082279(-)	282.34	3.47	6.34635
scaffold_6:1909821-1910088(-)	74.68	0.93	6.32735
scaffold_1:1054791-1056179(-)	101.92	1.27	6.32646
scaffold_9:1396263-1396750(+)	203.01	2.54	6.32058
scaffold_3:155187-155833(-)	184.58	2.31	6.32021
scaffold_6:262675-263007(+)	110.67	1.39	6.31504
scaffold_19:4321-4600(-)	91.32	1.16	6.29873
scaffold_9:1064948-1065522(-)	245.53	3.12	6.29821
scaffold_10:1210339-1210752(+)	73.14	0.93	6.29729
scaffold_8:1366997-1367586(-)	435.1	5.55	6.29272
scaffold_8:1104658-1105011(+)	126.3	1.62	6.28472
scaffold_3:1838134-1839573(-)	793.04	10.18	6.28358
scaffold_1:4306555-4307445(+)	368.73	4.74	6.28153
scaffold_3:2835438-2836250(+)	161.8	2.08	6.28148
scaffold_3:942512-942677(-)	267.59	3.47	6.26894
scaffold_3:3941319-3941570(-)	214.28	2.78	6.26827
scaffold_5:1463171-1463412(-)	302.7	3.93	6.26722
scaffold_8:1516222-1516515(-)	177.33	2.31	6.2624
scaffold_1:860701-862188(-)	467.4	6.13	6.25263
scaffold_5:1225644-1227101(+)	467.4	6.13	6.25263
scaffold_1:3976853-3976968(+)	70.48	0.93	6.24384
scaffold_5:671457-672308(-)	165.8	2.2	6.2358
scaffold_13:113085-113370(+)	104.48	1.39	6.232
scaffold_8:1160742-1161010(+)	138.15	1.85	6.22257
scaffold_1:1081086-1081463(+)	155.17	2.08	6.22112
scaffold_5:1703889-1704440(+)	479.19	6.44	6.21739
scaffold_4:3488671-3489699(-)	160.72	2.16	6.21737
scaffold_4:3482338-3483366(+)	160.72	2.16	6.21737
scaffold_1:4735879-4736422(-)	154.25	2.08	6.21254
scaffold_3:724311-724801(-)	154.01	2.08	6.2103
scaffold_13:786547-787554(-)	134.76	1.85	6.18672
scaffold_5:770918-771475(+)	672	9.25	6.18286
scaffold_4:1723003-1723293(-)	100.71	1.39	6.17898
scaffold_2:2800703-2801268(+)	383.29	5.32	6.17087
scaffold_4:590435-591070(-)	100.13	1.39	6.17065
scaffold_5:541524-541892(+)	123.68	1.73	6.1597
scaffold_7:1557627-1557731(-)	66.04	0.93	6.14997
scaffold_5:1232933-1233287(-)	103.61	1.5	6.11006
scaffold_6:1035197-1035960(-)	158.61	2.31	6.10145
scaffold_8:1158944-1159311(+)	141.82	2.08	6.09133
scaffold_7:208137-208385(-)	157.5	2.31	6.09132
scaffold_1:4195276-4195774(+)	252.06	3.7	6.0901
scaffold_2:1345771-1347165(-)	149.63	2.2	6.08775
scaffold_10:908257-908829(+)	78.41	1.16	6.07884
scaffold_8:560127-560715(-)	262.73	3.89	6.07767
scaffold_10:1159093-1160364(+)	134.91	2	6.07585
scaffold_7:1556364-1556890(-)	426.2	6.36	6.06636
scaffold_10:380803-381465(-)	1017.01	15.22	6.06222
scaffold_9:866120-866442(-)	154.01	2.31	6.05899
scaffold_3:1142121-1142864(+)	396.4	6.01	6.04345
scaffold_7:1557907-1558038(-)	90.94	1.39	6.03176
scaffold_1:4571983-4572828(+)	367.86	5.67	6.01966
scaffold_2:1011686-1011870(+)	87.94	1.39	5.98336
scaffold_2:1654828-1655468(+)	379.61	6.01	5.98101
scaffold_1:3654410-3654815(+)	73.19	1.16	5.97945
scaffold_3:877162-877947(+)	173.7	2.78	5.96537
scaffold_4:98233-98744(-)	201.8	3.24	5.96079
scaffold_1:4880123-4880627(-)	244.48	3.93	5.95904
scaffold_1:3176104-3178107(+)	129.37	2.08	5.95878
scaffold_2:4401629-4402084(-)	693.15	11.22	5.94902
scaffold_6:431301-432410(+)	70.98	1.16	5.93522
scaffold_8:1517145-1517723(+)	141.1	2.31	5.93268
scaffold_1:3714910-3715365(-)	253.7	4.16	5.9304
scaffold_8:1696813-1697542(-)	56.59	0.93	5.92717
scaffold_4:871849-872545(+)	357.13	5.9	5.91959
scaffold_9:1397600-1398069(-)	335.6	5.55	5.91811
scaffold_1:689628-690463(+)	179.89	3.01	5.90121
scaffold_7:1739400-1739807(+)	317.41	5.32	5.89878
scaffold_1:5325916-5326458(-)	302.06	5.09	5.89103
scaffold_4:4254335-4254765(-)	101.77	1.73	5.8784
scaffold_3:1039369-1039910(-)	101.61	1.73	5.87613
scaffold_6:2090101-2090266(-)	67.46	1.16	5.86184
scaffold_13:5884-6047(+)	95.48	1.65	5.85466
scaffold_1:3517472-3518170(+)	475.15	8.33	5.83392
scaffold_4:2942169-2942519(-)	79.13	1.39	5.83107
scaffold_10:568235-568855(-)	419.47	7.4	5.8249
scaffold_2:1012203-1012388(+)	78.36	1.39	5.81696
scaffold_3:3257954-3258378(+)	168.77	3.01	5.80915
scaffold_4:869830-870258(+)	71.15	1.27	5.80796
scaffold_2:1972074-1973272(-)	83.73	1.5	5.80271
scaffold_13:169909-170206(+)	128.47	2.31	5.79739
scaffold_4:44011-44666(-)	782.59	14.11	5.79347
scaffold_2:2517721-2517834(+)	76.72	1.39	5.78645
scaffold_6:1408653-1408923(+)	55.14	1	5.78503
scaffold_12:381044-381493(-)	292.84	5.32	5.78254
scaffold_9:378995-379313(-)	133.62	2.43	5.78104
scaffold_1:4736719-4737143(-)	177.96	3.24	5.77942
scaffold_6:177400-177483(+)	54.76	1	5.77505
scaffold_4:876070-876666(-)	136.79	2.54	5.75099
scaffold_9:866505-866706(-)	53.69	1	5.74658
scaffold_8:195603-196031(+)	67.86	1.27	5.73966
scaffold_8:528115-528346(+)	86.2	1.62	5.73362
scaffold_8:723362-723813(+)	53.16	1	5.73227
scaffold_3:878109-878714(-)	54.92	1.04	5.72268
scaffold_8:153294-153408(+)	52.72	1	5.72028
scaffold_2:2681154-2681873(+)	401.09	7.63	5.7161
scaffold_1:5769-6417(-)	54.58	1.04	5.71372
scaffold_11:701013-701644(+)	169.06	3.24	5.7054
scaffold_5:1116318-1116685(+)	66.25	1.27	5.70502
scaffold_6:2607773-2608127(+)	119.81	2.31	5.69671
scaffold_5:2699985-2700489(+)	170.21	3.31	5.68434
scaffold_6:1124217-1124721(+)	170.21	3.31	5.68434
scaffold_1:4760136-4760667(+)	50.98	1	5.67186
scaffold_3:3150334-3150771(+)	235.18	4.63	5.66661
scaffold_7:170360-170747(-)	93.94	1.85	5.66614
scaffold_2:4513187-4513768(+)	140.9	2.78	5.66344
scaffold_4:3208386-3208890(+)	167.38	3.31	5.66015
scaffold_8:723873-724404(+)	478	9.48	5.65598
scaffold_3:942165-942452(-)	126.92	2.54	5.64295
scaffold_8:1526775-1527563(+)	195.76	3.93	5.63841
scaffold_13:113555-113838(+)	138.05	2.78	5.63396
scaffold_2:4054027-4054572(+)	296	6.01	5.62209
scaffold_6:2169946-2170141(+)	67.82	1.39	5.60855
scaffold_5:976799-977180(+)	112.7	2.31	5.60845
scaffold_2:2084733-2086976(+)	524.43	10.75	5.60834
scaffold_2:612598-613924(-)	137.76	2.89	5.57494
scaffold_8:1842895-1843293(-)	228.36	4.86	5.55421
scaffold_8:851578-851909(+)	54.27	1.16	5.54796
scaffold_2:2494686-2495393(-)	204.12	4.39	5.53905
scaffold_14:130263-130337(+)	64.28	1.39	5.53121
scaffold_10:1202192-1202472(-)	69.22	1.5	5.52815
scaffold_10:419884-420078(+)	68.72	1.5	5.5177
scaffold_2:2053866-2053979(+)	63.56	1.39	5.51496
scaffold_1:5402801-5403559(+)	52.6	1.16	5.50287
scaffold_8:197621-198326(+)	204.46	4.51	5.50255
scaffold_2:1960672-1960735(+)	82.89	1.85	5.4856
scaffold_5:1705057-1705938(+)	330.61	7.4	5.48146
scaffold_6:2608182-2608596(+)	440.95	10.29	5.4213
scaffold_4:4081436-4081756(-)	165.52	3.93	5.39633
scaffold_8:997021-997518(-)	308.46	7.4	5.38141
scaffold_2:3869561-3869834(+)	77.01	1.85	5.37945
scaffold_2:3987729-3988516(+)	330.6	7.98	5.37255
scaffold_1:1229435-1231969(-)	74.78	1.85	5.33706
scaffold_8:1513700-1514116(-)	260.53	6.48	5.32931
scaffold_3:1576827-1577282(-)	333.55	8.33	5.32344
scaffold_4:293271-293521(-)	70.52	1.85	5.25244
scaffold_5:2217921-2218282(-)	55.14	1.46	5.23906
scaffold_8:1056348-1056794(+)	78.07	2.08	5.23011
scaffold_11:496712-497601(+)	56.08	1.5	5.22445
scaffold_11:701954-702426(-)	182.65	4.97	5.19969
scaffold_10:1093573-1094667(-)	92.68	2.54	5.18936
scaffold_1:4760885-4761330(+)	235.71	6.48	5.18488
scaffold_5:1533459-1534490(+)	50.4	1.39	5.18027
scaffold_1:3725858-3726466(-)	368.63	10.18	5.17836
scaffold_8:34629-35427(-)	57.74	1.62	5.15551
scaffold_3:4614063-4614312(+)	173.14	4.86	5.15484
scaffold_7:120965-121366(+)	81.5	2.31	5.14084
scaffold_1:4092560-4093255(-)	156.48	4.51	5.11671
scaffold_1:5687850-5688568(+)	62.35	1.85	5.07479
scaffold_5:1120412-1121026(-)	72.89	2.19	5.05672
scaffold_4:3207902-3208330(+)	123.53	3.78	5.03033
scaffold_1:4880683-4881111(-)	120.92	3.78	4.99952
scaffold_5:2699501-2699929(+)	120.92	3.78	4.99952
scaffold_5:975873-976423(+)	85.3	2.67	4.99763
scaffold_6:1123733-1124161(+)	117.47	3.7	4.98862
scaffold_1:5210533-5210844(+)	151.5	4.86	4.96222
scaffold_4:1076134-1076462(+)	64.09	2.08	4.94544
scaffold_4:130174-130365(+)	70.86	2.31	4.93901
scaffold_9:1193514-1194184(-)	99.37	3.24	4.93874
scaffold_10:971414-971814(+)	85.13	2.78	4.93651
scaffold_2:4640022-4640976(-)	409.99	13.64	4.90967
scaffold_3:1284618-1285148(+)	54.71	1.85	4.88621
scaffold_3:4055502-4056289(-)	92.05	3.12	4.8828
scaffold_3:2179529-2179845(+)	155.03	5.32	4.86498
scaffold_14:129930-130067(+)	52.77	1.85	4.83412
scaffold_4:3855158-3855884(+)	143.27	5.12	4.80645
scaffold_1:5688627-5689083(+)	54.9	2.08	4.72215
scaffold_8:1244389-1244862(-)	52.56	2.08	4.65931
scaffold_11:491736-491947(+)	154.53	6.24	4.6302
scaffold_2:1171640-1171764(+)	59.54	2.54	4.55096
scaffold_7:879625-880732(-)	101.12	4.39	4.5257
scaffold_1:3977229-3977974(+)	94.74	4.16	4.50932
scaffold_3:3577108-3577421(-)	105.03	4.7	4.482
scaffold_8:1514417-1514603(-)	51.42	2.31	4.47636
scaffold_1:5210111-5210312(+)	78.12	3.58	4.44766
scaffold_5:974886-975284(+)	58.83	2.85	4.36752
scaffold_9:936397-937529(+)	84.79	4.39	4.2716
scaffold_5:462830-463557(+)	68.98	3.58	4.26815
scaffold_6:2426515-2427800(+)	90.21	5.67	3.99187
scaffold_7:1062007-1062295(-)	62.24	3.93	3.98524
scaffold_5:824729-825746(+)	101.43	6.48	3.96835
scaffold_5:461882-462748(+)	73.06	4.97	3.87776
scaffold_7:737712-738401(+)	169.02	11.91	3.82695
scaffold_5:659756-661368(+)	62.98	4.74	3.73193
scaffold_2:4447229-4448602(-)	54.32	4.16	3.70683
scaffold_4:1287595-1287760(+)	58.53	4.63	3.66009
scaffold_6:2110855-2111066(+)	84.65	6.74	3.65069
scaffold_8:866523-866959(+)	71.86	5.78	3.63605
scaffold_7:738548-739126(+)	69.96	5.9	3.56774
scaffold_3:3576478-3577050(-)	160.75	13.61	3.56208
scaffold_6:763703-764469(+)	59.75	5.55	3.42838
scaffold_5:2605783-2606079(+)	103.59	9.94	3.3815
scaffold_6:1537237-1537954(+)	89	8.56	3.37812
scaffold_3:1635410-1635657(+)	59.69	5.78	3.36835
scaffold_4:1476634-1477442(-)	59.61	5.78	3.36641
scaffold_2:4318833-4319390(-)	106.73	10.79	3.3062
scaffold_9:1210953-1212272(+)	72.93	7.55	3.27196
scaffold_1:504374-504867(+)	66.69	7.03	3.24587
scaffold_3:2646784-2647434(+)	72.62	8.46	3.10164
scaffold_2:3572093-3572977(-)	78.44	9.71	3.01405
scaffold_67:1965-2393(+)	173.26	22.43	2.94944
scaffold_3:1633841-1634375(+)	76.38	11.1	2.78264
scaffold_6:1536567-1537180(+)	79.18	12.49	2.66436
scaffold_2:2579478-2580562(-)	70.02	11.68	2.58373
scaffold_6:823302-823831(-)	53.38	9.31	2.51945
scaffold_1:5005031-5005348(+)	106.66	19.77	2.43163
scaffold_1:4024085-4024422(+)	50.79	9.71	2.387
scaffold_7:826891-827671(-)	67.59	13.07	2.37055
scaffold_4:4204171-4205042(+)	104.46	22.91	2.1889
scaffold_1:3484245-3485076(-)	121.71	28.21	2.10917
scaffold_4:2162743-2165211(+)	63.08	15.03	2.06934
scaffold_7:487926-488447(-)	70.07	17.31	2.01719
scaffold_13:505315-507633(+)	158.03	39.16	2.01275
scaffold_12:782492-784158(-)	114.67	29.01	1.98287
scaffold_4:3497941-3498484(-)	71.4	18.69	1.93366
scaffold_7:2033129-2033995(-)	54.82	16.59	1.72439
scaffold_3:4312988-4313857(+)	57.91	18.88	1.61695
